# Supplementary material for: Exploring p53 isoforms: unraveling heterogeneous p53 tumor suppressor functionality in uveal melanoma
Source: Cell Death Discov. 2025 Dec 5;12:39. doi: 10.1038/s41420-025-02891-1 (PMC12827457; doi:10.1038/s41420-025-02891-1)
Supplement: Supplementary file 14 — Supplementary Table 2 [file 41420_2025_2891_MOESM14_ESM.xlsx]

## Sheet: Foglio1
Sample_ID	Sex	Age at Diagnosis	Eye	Localization	Tumor_Thickness	Tumor_Basal_Diameter	TNM	Treatment	Treatment date	Second Treatment	Second Treatment date	Adjuvant therapy	Cause_enucleation	Histology	Cause of Death	Metastases	FU_Data_endpoint	FU_Data_Death	FU_Data_rmetastasis	CNV_1p	CNV_3p	CNV_6p	CNV_8q	GNAQ	GNA11	BAP1	SF3B1	EIF1AX
MU003	M	64.3444	DX	anterior	15	23	T4a	enucleation	2005-12-16	na		no	prognosis	mixed	Dead_Metastatic Uveal Melanoma	yes	2009-01-15	2009-01-15	2008-07-15	losses	losses	2	2	WT	c.626A>T p.Gln2WT9Leu	c.517T>G p.Tyr173Asp		WT
MU005	M	73.0333	DX	posterior	13	19.6	T4a	enucleation	2007-07-20	na		no	prognosis	spindle cell	Dead_other_cause	no	2011-01-24	2011-01-24		losses	2	2	2	WT	WT	WT	WT	WT
MU007	F	67.5722	SN	anterior	13	12	T2a	enucleation	2007-01-26	na		no	prognosis	epitheloid	Dead_Metastatic Uveal Melanoma	yes	2010-08-15	2010-08-15		2	1	2	>2	WT	WT	WT	WT	WT
MU008	F	73.0917	DX	anterior	10.7	9	T3a	enucleation	2007-01-19	na		no	prognosis	mixed	Dead_Metastatic Uveal Melanoma	yes	2007-11-01	2007-11-01		losses	2	>2	complex	WT	WT	WT	WT	WT
MU010	M	69.1361	DC	posterior	11		T4	enucleation	2007-02-21				prognosis	mixed	Dead_Metastatic Uveal Melanoma	yes	2009-02-04	2009-02-04	2008-11-15	2	1	2	gains	WT	c.626A>T p.Gln2WT9Leu	c.1817_1821del p.Ala6WT6Glyfs*35	WT	WT
MU012	F	72.9806	SN	posterior	7.6	10.5	T2a	proton beam	2006-02-15	enucleation	2007-09-03	yes	post terapia	mixed	Alive	yes	2014-09-16		2013-10-15	2	1	2	>2	WT	WT	c.265_300del p.Asn89_Leu100del	WT	WT
MU013	M	69.0972	SN	posterior	14.5	17	T3a	enucleation	2007-03-16			no	prognosis	epitheloid	Alive	no	2010-12-28			1	2	>2	>2	WT	c.626A>T p.Gln2WT9Leu	c.2WT57 G>T pGly686Val	WT	WT
MU015	M	73.1639	SN	posterior	8.3			proton beam	2006-06-15	enucleation	2007-04-20	no	post terapia	epitheloid	Alive	yes	2010-04-15		2010-01-15	2	losses	2	>2	WT	WT	c.29WT T>C p.Leu97Pro		WT
MU016	F	77	SN	posterior	7.6	9	T2a	enucleation	2007-06-04			no	prognosis	mixed	Alive	no	2010-01-15			2	2	2	2	WT	WT	WT		c.5C>T p.Pro2Leu
MU018	M	62.2139	SN	posterior	3.1	12	T2c	enucleation	2007-06-22			yes	prognosis	spindle cell	Alive	no	2017-06-15			1?	1				WT			WT
MU020	F	55.3694	SN	posterior	12.5	13	T3a	enucleation	2007-06-07			yes	prognosis	spindle cell	Alive	no	2019-03-15			2	2	>2	gains	WT	WT	WT	WT	WT
MU023	F	68.5694	DX	posterior	9.2		T2	proton beam	2005-01-15	enucleation	2007-12-14	yes	post terapia	mixed	Alive	no	2011-06-08			losses	2	2	gains	WT	WT	WT	WT	WT
MU025	M	32.5778	SN	posterior	7.56	15	T3a	enucleation	2007-11-30			no	prognosis	spindle cell	Alive	no	2009-02-04			1	2	gains	gains	c.626A>T p.Gln2WT9Leu	WT	WT		WT
MU031	F	68.6861	DX	posterior	14.7	19.1	T2a	enucleation	2008-02-08			no	prognosis		Alive	yes	2010-05-06		2009-02-15	losses	1	2	>2	WT	WT	c.1755dup p.Ile586Hisfs*57	WT	WT
MU032	F	75.3306	DX	posterior	5.3	12	T2a	enucleation	2008-02-20			yes	prognosis	spindle cell	Dead_other_cause	no	2018-10-15	2018-10-15		2	2	2	gains	WT	WT	WT	WT	WT
MU033	M	59.1694	SN	posterior	5.2	9.5	T2a	enucleation	2008-03-07			no	prognosis		Alive	no	2016-07-05							WT	WT	WT	WT	WT
MU034	M	51.0306	DX	anterior	10.5	15	T2a	enucleation	2008-03-25			no	prognosis	mixed	Alive	yes	2010-12-03		2009-10-15	losses	1	2	gains	c.626A>T p.Gln2WT9Leu	WT	WT
MU036	M	79.6417	SN	anterior	16	13	T2c	enucleation	2008-04-09			no	prognosis	epitheloid	Dead_other_cause	no	2010-09-09	2010-09-09	2009-02-01	2	1	2	gains	WT	c.626A>T p.Gln2WT9Leu	c.2089T>C p.Ser697Pro	WT	WT
MU037	M	83.3028	DX	posterior	10			proton beam	2001-07-15	enucleation	2008-05-28	yes	post terapia		Alive	no	2009-02-05			2	2	2	gains	WT	WT	WT	WT	WT
MU039	M	59.6389	DX	posterior	5		T2c	enucleation	2008-07-03			no	prognosis	epitheloid	Alive	no	2013-06-13			losses	1	losses	gains	WT	WT	c.287_3WT7del p.Leu96_Asn1WT2del	WT	WT
MU040	M	50.8778	DX	posterior	9		T2a	proton beam	2007-02-15	enucleation	2008-07-25	yes	prognosis	epitheloid	Alive	yes	2015-05-19		2015-04-15	2	losses	2	2	c.626A>T p.Gln209Arg	WT	c.124 C>T p.Pro42Ser	WT	WT
MU041	M	48.4778	SN	posterior	6.12			enucleation	2008-08-06			yes	prognosis		Alive	no	2012-07-12			2	1	2	2	c.626A>T p.Gln209Leu	WT	WT	WT	WT
MU042	F	59.1556	DX	posterior	10			enucleation	2008-10-29				prognosis		Dead_Metastatic Uveal Melanoma	yes	2010-04-14		2009-09-09	losses	1	2	gains	WT	WT	WT	WT	WT
MU046	M	44.9	SN	posterior	6.94		T2a	enucleation	2009-02-11			yes	prognosis	epitheloid	Alive	yes	2009-09-30		2009-09-30	2	1	2	gains	WT	c.626A>T p.Gln2WT9Leu	WT	WT	WT
MU050	M	74.5278	DX	posterior	7.9			enucleation	2009-03-13			no	prognosis		Dead_Metastatic Uveal Melanoma	yes	2011-11-11	2011-11-11	2009-10-21
MU060	M	47.5583	DX	anterior	11.5		T3b	enucleation	2010-07-19			yes	prognosis	spindle cell	Alive	yes	2014-03-15		2013-11-04	losses	2	2	gains	c.626A>T p.Gln2WT9Leu	WT	WT	c.1873C>T p.Arg625Cys	WT
MU062	M	66.4361	DX	posterior	13.1	21.82	T4a	enucleation	2010-07-28				prognosis	epitheloid	Alive	no	2015-07-02			2	2	2	2	WT	c.626A>T p.Gln2WT9Leu	c.2WT57-22A>C + c.*45C>G (SNP rs56898787)	WT	c.38G>Como p.Arg13Pro
MU063	M	74.9306	DX	posterior	5.77		T2a	proton beam	2010-02-15	enucleation	2010-07-07	yes	prognosis	epitheloid	Dead_Metastatic Uveal Melanoma	yes	2016-01-12		2014-11-26	2	1	2	>2	WT	WT	c.579_58WT+7del p.His193GlnfsX49	WT	WT
MU064	F	69.6806	SN	posterior	12.09		T2a	enucleation	2010-08-26				prognosis	epitheloid	Alive	yes	2018-05-15		2016-08-04	1	1	2	gains	WT	c.547C>T p.Arg183Cys	c.836C>G p.Ser279X	WT	WT
MU066	M	70.4917	DX	posterior	11.42	18.72	T4a	enucleation	2010-08-23				prognosis	epitheloid	Dead_Metastatic Uveal Melanoma	yes	2013-12-15		2013-12-15	losses	1	>2	>2	WT	WT	c.819_822del p.His274SerfsX6WT	WT	WT
MU75	F															yes										c.1228C>T p.Gln41WT*	WT
MU076	M	57.9333	DX	posterior	11.7	12.62	T2a	enucleation	2010-12-20				prognosis	epitheloid	Alive	no	2018-09-15			2	2	>2	2	WT	c.626A>T p.Gln2WT9Leu	0	WT	c.44G>A p.Gly15Asp
