# Supplementary material for: Exploring p53 isoforms: unraveling heterogeneous p53 tumor suppressor functionality in uveal melanoma
Source: Cell Death Discov. 2025 Dec 5;12:39. doi: 10.1038/s41420-025-02891-1 (PMC12827457; doi:10.1038/s41420-025-02891-1)
Supplement: Supplementary file 18 — Supplementary Table 6 [file 41420_2025_2891_MOESM18_ESM.xlsx]

## Sheet: Foglio1
Hugo_Symbol	Chromosome (build 37)	Start_Position	End_Position	Variant_Classification	Variant_Type	Reference_Allele	Tumor_Seq_Allele1	Tumor_Seq_Allele2	Tumor_Sample_Barcode	Amino_Acid_Change	CDS_Change	Primary site group	mutation per megabase
TP53	17	7577107	7577107	Nonsense_Mutation	SNP	A	A	T	MELA_0796	p.Cys277*	c.831T>A	NA	0.874
TP53	17	7578271	7578271	Missense_Mutation	SNP	T	C	T	MELA_0847	p.His193Arg	c.578A>G	ciliary body	0.49
TP53	17	7578466	7578466	Missense_Mutation	SNP	G	A	G	MELA_0847	p.Thr155Ile	c.464C>T	ciliary body	0.49
TP53	17	7578289	7578289	Frame_Shift_Del	DEL	C	C	-	MELA_0853	p.Gly187fs	c.560delG	Choroidal	0.602
TP53	17	7574003	7574003	Nonsense_Mutation	SNP	G	A	G	MELA_0672	p.Arg342*	c.1024C>T	Choroidal	3.4
TP53	17	7577538	7577538	Missense_Mutation	SNP	C	C	T	MELA_0672	p.Arg248Gln	c.743G>A	Choroidal	3.4
Supplementary Table 6: TP53 SNPs and indels found in UM samples in the work of Newell et al,
genomic coordinates are based on NCBI build reference 37. Table based on supplementary table 5 of
Newell and coauthors (melanoma sample subtype information, e.g. Uveal, is in supplementary table
1 of the same work) [1].
		REFERENCES
[1] Newell F, Johansson PA, Wilmott JS, Nones K, Lakis V, Pritchard AL, et al. Comparative
Genomics Provides Etiologic and Biological Insight into Melanoma Subtypes. Cancer Discov.
2022;12:2856-79.
